# Supplementary material for: How citizen science could improve Species Distribution Models and their independent assessment
Source: bioRxiv or medRxiv preprint supplement (doi:10.1101/2020.06.02.129536), 2020-09-22
Supplement: Supplementary file [file media-2.pdf]

## Appendix 2 – Environmental variables: additional information

| Variable category | Code                           | Variable description                                                                                                                                                                                                     | References                                                                                                                                                                                                                                                            |
|-------------------|--------------------------------|--------------------------------------------------------------------------------------------------------------------------------------------------------------------------------------------------------------------------|-----------------------------------------------------------------------------------------------------------------------------------------------------------------------------------------------------------------------------------------------------------------------|
| Climatic          | CLIM_1                         | first axis from a PCA on 12 worldclim variables and altitude (see Table 4)                                                                                                                                               | Rothermel and Semlitsch, 2002; Pineda and Lobo, 2009; Girardello <i>et al.</i> , 2010; Hartel <i>et al.</i> , 2010                                                                                                                                                    |
|                   | CLIM_2                         | second axis from a PCA on 12 worldclim variables and altitude (see Table 4)                                                                                                                                              |                                                                                                                                                                                                                                                                       |
| Land cover        | %WOOD_DM                       | Proportion of deciduous and mixed forest                                                                                                                                                                                 | Pope, Fahrig and Merriam, 2000; Pellet, Guisan and Perrin, 2004; Cushman, 2006; Zanini <i>et al.</i> , 2008; Hartel <i>et al.</i> , 2010; Boissinot <i>et al.</i> , 2015; Zhang <i>et al.</i> , 2016; Collins and Fahrig, 2017; Boissinot, Besnard and Lourdais, 2019 |
|                   | %WOOD_C                        | Proportion of coniferous forest                                                                                                                                                                                          |                                                                                                                                                                                                                                                                       |
|                   | %CROP                          | Proportion of crop                                                                                                                                                                                                       |                                                                                                                                                                                                                                                                       |
|                   | %PASTURE                       | Proportion of permanent pasture                                                                                                                                                                                          |                                                                                                                                                                                                                                                                       |
|                   | NB_PONDS                       | Ponds density                                                                                                                                                                                                            |                                                                                                                                                                                                                                                                       |
|                   | L_HEDGE                        | Hedgerow density                                                                                                                                                                                                         |                                                                                                                                                                                                                                                                       |
|                   | L_ROAD_1ST                     | Primary Road density out of urban area                                                                                                                                                                                   |                                                                                                                                                                                                                                                                       |
|                   | L_ROAD_2ND                     | Secondary Road density out of urban area                                                                                                                                                                                 |                                                                                                                                                                                                                                                                       |
|                   | L_RIVER                        | Permanent rivers and canals density                                                                                                                                                                                      |                                                                                                                                                                                                                                                                       |
| %URBAN            | Proportion of urban (build up) | Knutson <i>et al.</i> , 1999; Lehtinen, Galatowitsch and Tester, 1999; Mann <i>et al.</i> , 2009; Hartel <i>et al.</i> , 2010; Boissinot, Besnard and Lourdais, 2019                                                     |                                                                                                                                                                                                                                                                       |
|                   |                                | Scribner <i>et al.</i> , 2001; Janin <i>et al.</i> , 2009; Hartel <i>et al.</i> , 2010                                                                                                                                   |                                                                                                                                                                                                                                                                       |
|                   |                                | Janin <i>et al.</i> , 2009; Ribeiro <i>et al.</i> , 2011; Arntzen <i>et al.</i> , 2017; Boissinot, Besnard and Lourdais, 2019                                                                                            |                                                                                                                                                                                                                                                                       |
|                   |                                | Joly <i>et al.</i> , 2001; Pellet, Guisan and Perrin, 2004; Vos <i>et al.</i> , 2007; Angelone, Kienast and Holderegger, 2011; Boissinot, Besnard and Lourdais, 2019                                                     |                                                                                                                                                                                                                                                                       |
|                   |                                | Vos and Chardon, 1998; Carr and Fahrig, 2001; Hels and Buchwald, 2001; Cushman, 2006; Eigenbrod, Hecnar and Fahrig, 2008; Hartel <i>et al.</i> , 2010; Petrovan and Schmidt, 2016; Boissinot, Besnard and Lourdais, 2019 |                                                                                                                                                                                                                                                                       |
|                   |                                | Ficetola <i>et al.</i> , 2008                                                                                                                                                                                            |                                                                                                                                                                                                                                                                       |
|                   |                                | Rubbo and Kiesecker, 2005; Gagné and Fahrig, 2007; Hartel <i>et al.</i> , 2010; Cayuela <i>et al.</i> , 2015; Zhang <i>et al.</i> , 2016                                                                                 |                                                                                                                                                                                                                                                                       |

**Table 1. Environmental variables used for species distribution modelling of each amphibian species in Pays de la Loire region and associated references.** See Figure 2/ table 4 for the list of climatic variables.

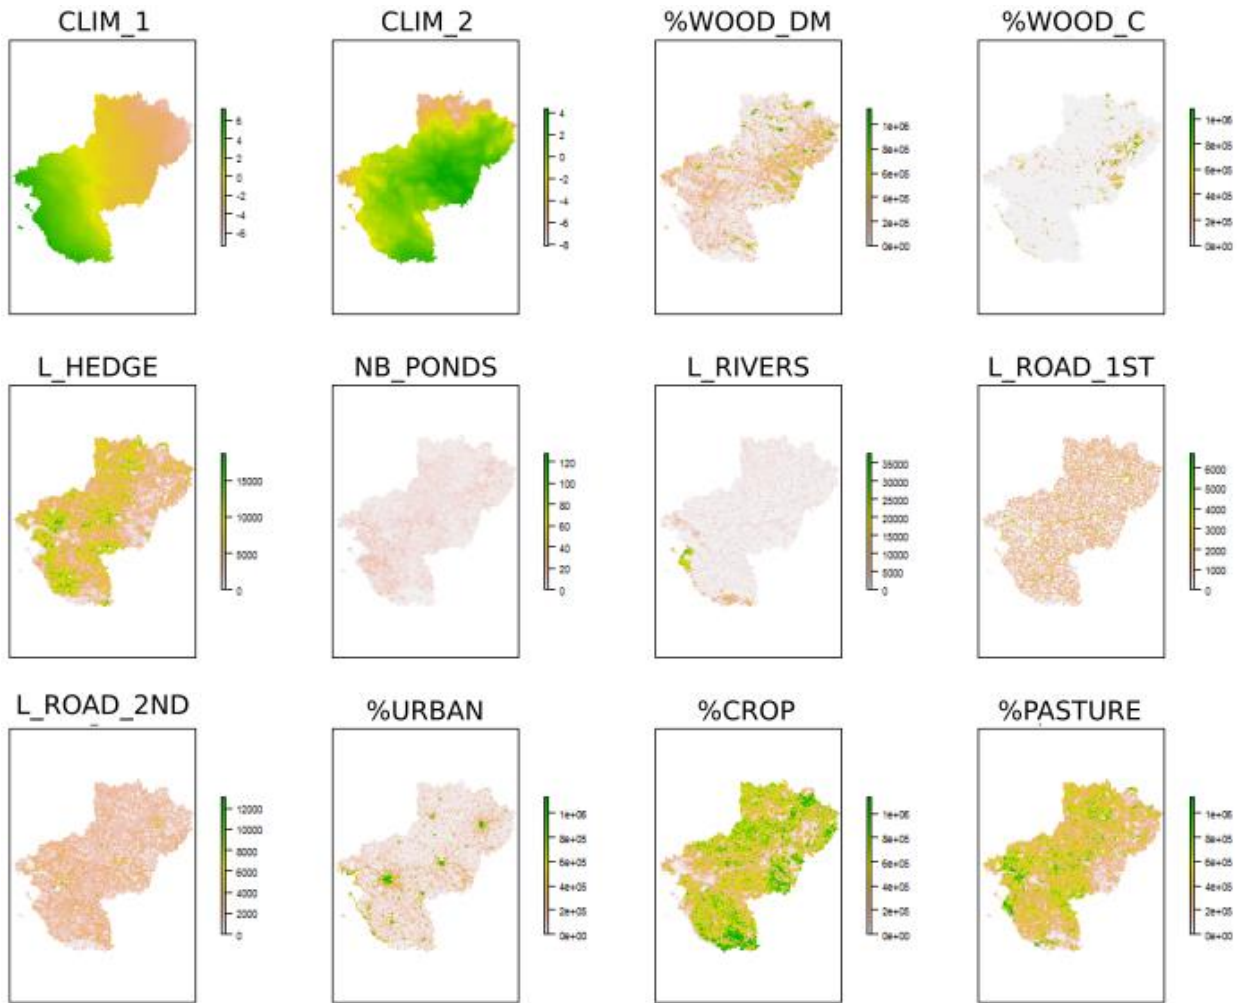

**Figure 1. Environmental variables used for modelling species distribution (before scaling). Final maps resolution: 500m. CLIM\_1 and CLIM\_2 initial resolution was 5km<sup>2</sup>.**

| Variables  | VIF  |
|------------|------|
| CLIM_1     | 1,26 |
| CLIM_2     | 1,09 |
| %WOOD_DM   | 2,86 |
| %WOO8C     | 1,89 |
| L_HEDGE    | 1,89 |
| NB_PONDS   | 1,18 |
| L_RIVERS   | 1,27 |
| L_ROAD_1ST | 1,05 |
| L_ROAD_2ND | 1,18 |
| %URBAN     | 2,66 |
| %CROP      | 5,26 |
| %PASTURE   | 4,67 |

**Table 2. Variance inflation factor values for each predictor**

|            | CLIM_1 | CLIM_2 | %WOOD_DM | %WOO8C | L_HEDGE | NB_PONDS | L_RIVERS | L_ROAD_1ST | L_ROAD_2ND | %URBAN | %CROP | %PASTURE |
|------------|--------|--------|----------|--------|---------|----------|----------|------------|------------|--------|-------|----------|
| CLIM_1     | 1,00   |        |          |        |         |          |          |            |            |        |       |          |
| CLIM_2     | 0,00   | 1,00   |          |        |         |          |          |            |            |        |       |          |
| %WOOD_DM   | -0,19  | 0,08   | 1,00     |        |         |          |          |            |            |        |       |          |
| %WOO8C     | -0,13  | 0,07   | 0,31     | 1,00   |         |          |          |            |            |        |       |          |
| L_HEDGE    | 0,14   | -0,19  | -0,33    | -0,28  | 1,00    |          |          |            |            |        |       |          |
| NB_PONDS   | 0,15   | 0,03   | -0,10    | -0,09  | 0,27    | 1,00     |          |            |            |        |       |          |
| L_RIVERS   | 0,28   | -0,03  | -0,10    | -0,06  | -0,09   | 0,03     | 1,00     |            |            |        |       |          |
| L_ROAD_1ST | -0,06  | 0,01   | -0,06    | -0,05  | 0,04    | 0,06     | -0,06    | 1,00       |            |        |       |          |
| L_ROAD_2ND | 0,08   | 0,04   | -0,20    | -0,19  | 0,10    | 0,09     | -0,11    | 0,08       | 1,00       |        |       |          |
| %URBAN     | 0,15   | 0,08   | -0,06    | -0,08  | -0,16   | 0,02     | -0,03    | 0,12       | 0,25       | 1,00   |       |          |
| %CROP      | -0,08  | 0,07   | -0,44    | -0,30  | 0,01    | -0,14    | -0,14    | 0,04       | 0,08       | -0,31  | 1,00  |          |
| %PASTURE   | 0,09   | -0,16  | -0,28    | -0,25  | 0,57    | 0,27     | 0,18     | -0,02      | 0,04       | -0,22  | -0,38 | 1,00     |

**Table 3. Pearson correlation test for each predictor**

**Climatic variables**

|           |                                             | Contribution (ACP) |       |       |       |       |       |
|-----------|---------------------------------------------|--------------------|-------|-------|-------|-------|-------|
|           |                                             | Dim.1              | Dim.2 | Dim.3 | Dim.4 | Dim.5 |       |
| VARIABLES | Altitude                                    | r_alt              | 7,18  | 7,52  | 0,62  | 44,81 | 22,89 |
|           | Annual mean temperature (°C)                | r_bio1             | 10,91 | 5,80  | 4,91  | 1,11  | 2,24  |
|           | Mean temperature of warmest quarter (°C)    | r_bio10            | 2,47  | 16,01 | 18,18 | 12,75 | 1,48  |
|           | Mean temperature of coldest quarter (°C)    | r_bio11            | 14,67 | 0,66  | 0,02  | 1,48  | 1,88  |
|           | Annual precipitation (mm)                   | r_bio12            | 9,50  | 7,44  | 0,14  | 6,53  | 20,79 |
|           | Precipitation seasonality (C of V)          | r_bio15            | 14,29 | 0,52  | 1,82  | 5,94  | 0,83  |
|           | Precipitation of wettest quarter (mm)       | r_bio16            | 11,82 | 4,32  | 0,01  | 6,77  | 11,86 |
|           | Precipitation of driest quarter (mm)        | r_bio17            | 1,10  | 18,31 | 14,72 | 2,48  | 0,17  |
|           | Precipitation of warmest quarter (mm)       | r_bio18            | 0,06  | 16,39 | 43,64 | 13,22 | 0,66  |
|           | Max temperature of warmest week (°C)        | r_bio5             | 1,95  | 18,28 | 11,16 | 2,30  | 6,93  |
|           | Temperature annual range (Bio05-Bio06) (°C) | r_bio7             | 12,01 | 4,07  | 4,43  | 1,96  | 5,07  |
|           | Mean temperature of wettest quarter (°C)    | r_bio8             | 14,03 | 0,67  | 0,34  | 0,64  | 25,19 |

**Table 4. variable selection and their contribution for each axis of the PCA**

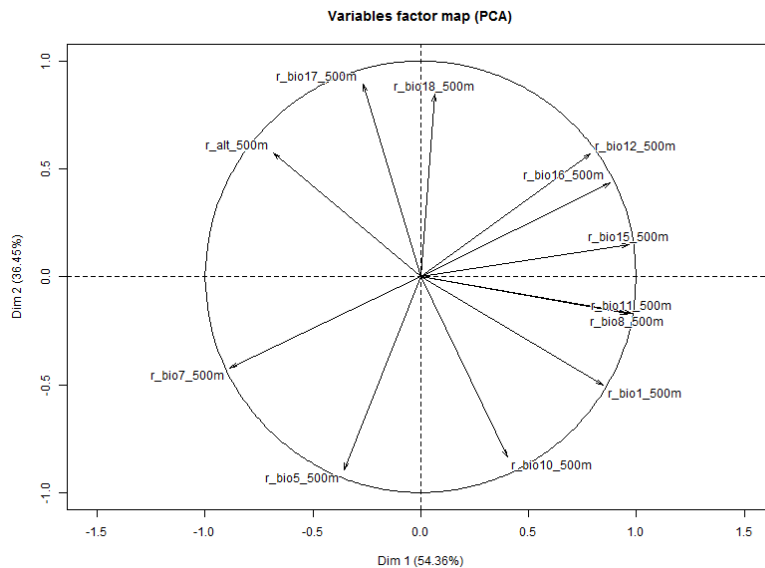

**Figure 2. Representation of the attributes on the factors 1 and 2 obtain by PCA by descriptor. We use layer for Worldclim at regional extent to obtain 2 layers according to axis 1 (CLIM\_1) and axis 2 (CLIM\_2) of the ACP. Final resolution was 500m to homogenize pixels size of climatic variables and landscape variables layers.**

## **Bibliography**

- Angelone, S., Kienast, F. and Holderegger, R. (2011) 'Where movement happens: Scale-dependent landscape effects on genetic differentiation in the European tree frog', *Ecography*, 34(5), pp. 714–722. doi: 10.1111/j.1600-0587.2010.06494.x.
- Arntzen, J. W. *et al.* (2017) 'Amphibian decline, pond loss and reduced population connectivity under agricultural intensification over a 38 year period', *Biodiversity and Conservation*. Springer Netherlands, 26(6), pp. 1411–1430. doi: 10.1007/s10531-017-1307-y.
- Boissinot, A. *et al.* (2015) 'Small woods positively influence the occurrence and abundance of the common frog (*Rana temporaria*) in a traditional farming landscape', *Amphibia Reptilia*, 36(4), pp. 417–424. doi: 10.1163/15685381-00003013.
- Boissinot, A., Besnard, A. and Lourdais, O. (2019) 'Agriculture, Ecosystems and Environment Amphibian diversity in farmlands: Combined influences of breeding-site and landscape attributes in western France', *Agriculture, Ecosystems and Environment*. Elsevier, 269(September 2018), pp. 51–61. doi: 10.1016/j.agee.2018.09.016.
- Carr, L. W. and Fahrig, L. (2001) 'Effect of Road Traffic on Two Amphibian Species of Differing Vagility', *Conservation Biology*, 15(4), pp. 1071–1078. doi: 10.1046/j.1523-1739.2001.0150041071.x.
- Cayuela, H. *et al.* (2015) 'Highlighting the effects of land-use change on a threatened amphibian in a human-dominated landscape', *Population Ecology*, 57(2), pp. 433–443. doi: 10.1007/s10144-015-0483-4.
- Collins, S. J. and Fahrig, L. (2017) 'Responses of anurans to composition and configuration of agricultural landscapes', *Agriculture, Ecosystems and Environment*. Elsevier B.V., 239, pp. 399–409. doi: 10.1016/j.agee.2016.12.038.
- Cushman, S. A. (2006) 'Effects of habitat loss and fragmentation on amphibians: A review and prospectus', *Biological Conservation*, 128(2), pp. 231–240. doi: 10.1016/j.biocon.2005.09.031.
- Eigenbrod, F., Hecnar, S. J. and Fahrig, L. (2008) 'The relative effects of road traffic and forest cover on anuran populations', *Biological Conservation*, 141(1), pp. 35–46. doi: 10.1016/j.biocon.2007.08.025.
- Ficetola, G. F. *et al.* (2008) 'Influence of Landscape Elements in Riparian Buffers on the Conservation of Semiaquatic Amphibians', 23(1), pp. 114–123. doi: 10.1111/j.1523-1739.2008.01081.x.
- Gagné, S. A. and Fahrig, L. (2007) 'Effect of landscape context on anuran communities in breeding ponds in the National Capital Region, Canada', *Landscape Ecology*, 22(2), pp. 205–215. doi: 10.1007/s10980-006-9012-3.
- Girardello, M. *et al.* (2010) 'Models of climate associations and distributions of amphibians in Italy', *Ecological Research*, 25(1), pp. 103–111. doi: 10.1007/s11284-009-0636-z.
- Hartel, T. *et al.* (2010) 'Amphibian distribution in a traditionally managed rural landscape of Eastern Europe: Probing the effect of landscape composition', *Biological Conservation*, 143(5), pp. 1118–1124. doi: 10.1016/j.biocon.2010.02.006.
- Hels, T. and Buchwald, E. (2001) 'The effect of road kills on amphibian populations', *Biological Conservation*, 99(3), pp. 331–340. doi: 10.1016/S0006-3207(00)00215-9.
- Janin, A. *et al.* (2009) 'Assessing landscape connectivity with calibrated cost-distance modelling: Predicting common toad distribution in a context of spreading agriculture', *Journal of Applied Ecology*, 46(4), pp. 833–841. doi: 10.1111/j.1365-2664.2009.01665.x.
- Joly, P. *et al.* (2001) 'Habitat matrix effect on pond occupancy in newt', *Conservation Biology*, 15(1), pp. 239–248. doi: 10.1046/j.1523-1739.2001.99200.x.
- Knutson, M. G. *et al.* (1999) 'Effects of landscape composition and wetland fragmentation on frog and toad abundance and species richness in Iowa and Wisconsin, United States of America', *Conservation Biology*, 13(6), pp. 1437–1446. doi: 10.1046/j.1523-1739.1999.98445.x.
- Lehtinen, R. M., Galatowitsch, S. M. and Tester, J. R. (1999) 'Consequences of habitat loss and fragmentation for wetland amphibian assemblages', *Wetlands*, 19(1), pp. 1–12. doi: 10.1007/BF03161728.
- Mann, R. M. *et al.* (2009) 'Amphibians and agricultural chemicals: Review of the risks in a complex environment', *Environmental Pollution*. Elsevier Ltd, 157(11), pp. 2903–2927. doi: 10.1016/j.envpol.2009.05.015.
- Pellet, J., Guisan, A. and Perrin, N. (2004) 'A Concentric Analysis of the Impact of Urbanization on the Threatened European Tree Frog in an Agricultural Landscape', *Conservation Biology*, 18(6), pp. 1599–1606. doi: 10.1111/j.1523-1739.2004.0421a.x.
- Petrovan, S. O. and Schmidt, B. R. (2016) 'Volunteer conservation action data reveals large-scale and long-term negative population trends of a widespread amphibian, the common toad (*Bufo bufo*)', *PLoS ONE*, 11(10), pp. 1–12. doi: 10.1371/journal.pone.0161943.
- Pineda, E. and Lobo, J. (2009) 'Assessing the accuracy of species distribution models to predict amphibian species richness patterns', *Journal of Animal Ecology*, 78(i), pp. 182–190. doi: 10.1111/j.1365-2656.2007.0.
- Pope, S. E., Fahrig, L. and Merriam, H. G. (2000) 'Landscape complementation and metapopulation effects on leopard frog populations', *Ecology*, 81(9), pp. 2498–2508. doi: 10.1890/0012-9658(2000)081[2498:LCAMEO]2.0.CO;2.
- Ribeiro, R. *et al.* (2011) 'The pond network: Can structural connectivity reflect on (amphibian) biodiversity patterns?', *Landscape Ecology*, 26(5), pp. 673–682. doi: 10.1007/s10980-011-9592-4.
- Rothermel, B. B. and Semlitsch, R. D. (2002) 'An Experimental Investigation of Landscape Resistance of Forest versus Old-Field Habitats to Emigrating Juvenile Amphibians', *Conservation Biology*, 16(5), pp. 1324–1332. doi: 10.1046/j.1523-

1739.2002.01085.x.

- Rubbo, M. J. and Kiesecker, J. M. (2005) 'Amphibian breeding distribution in an urbanized landscape', *Conservation Biology*, 19(2), pp. 504–511. doi: 10.1111/j.1523-1739.2005.000101.x.
- Scribner, K. T. *et al.* (2001) 'Environmental correlates of toad abundance and population genetic diversity', *Biological Conservation*, 98(2), pp. 201–210. doi: 10.1016/S0006-3207(00)00155-5.
- Vos, C. C. *et al.* (2007) 'Matrix permeability of agricultural landscapes: An analysis of movements of the common frog (*Rana temporaria*)', *Herpetological Journal*, 17(3), pp. 174–182.
- Vos, C. C. and Chardon, J. P. (1998) 'Effects of habitat fragmentation and road density on the distribution pattern of the moor frog *Rana arvalis*', *Journal of Applied Ecology*, 35(1), pp. 44–56. doi: 10.1046/j.1365-2664.1998.00284.x.
- Zanini, F. *et al.* (2008) 'Landscape effects on anuran pond occupancy in an agricultural countryside: barrier-based buffers predict distributions better than circular buffers', *Canadian Journal of Zoology*, 86(7), pp. 692–699. doi: 10.1139/Z08-048.
- Zhang, W. *et al.* (2016) 'Responses of anuran communities to rapid urban growth in Shanghai, China', *Urban Forestry and Urban Greening*. Elsevier GmbH., 20, pp. 365–374. doi: 10.1016/j.ufug.2016.10.005.
